# Supplementary material
Source: PubMed Central journal article supplement (PMC7424282)
Supplement: gbaa002_suppl_supplementary_tables.pdf [file gbaa002_suppl_supplementary_tables.pdf]

Supplemental Table 1: *Structure Coefficients of General Cognitive Ability (g) for Husbands and Wives.*

|                      | Husbands       |      | Wives          |      |
|----------------------|----------------|------|----------------|------|
|                      | Factor Loading | SE   | Factor Loading | SE   |
| Verbal Learning      | 0.74           | 0.01 | 0.70           | 0.01 |
| Verbal Recall        | 0.66           | 0.01 | 0.61           | 0.01 |
| Visual Scanning      | 0.71           | 0.01 | 0.76           | 0.01 |
| Visuospatial Ability | 0.41           | 0.02 | 0.48           | 0.02 |
| Visual Memory        | 0.47           | 0.02 | 0.52           | 0.02 |
| Verbal Fluency       | 0.62           | 0.01 | 0.65           | 0.01 |
| Orientation          | 0.44           | 0.02 | 0.45           | 0.02 |

*Note.* Factor loadings are standardized estimates and represent the correlation between g and each factor indicator for husbands and wives. Model estimated correlation between husbands' and wives' factor scores is 0.67 ( $SE = 0.01$ ). Husbands and wives factor scores were estimated under this factor structure. Source: authors' own calculation using data from the 2012 Mexican Health and Aging Study (MHAS).

Supplemental Table 2. *Items used to measure perceived social support from one's spouse and depressive symptoms.*

**Social support items:**

About your spouse: (Response choices: a lot, a little, not at all)

- i. How much does your spouse understand your feelings about things?
- ii. How much can you confide in him/her if you have a serious problem?
- iii. How much does your spouse listen if you need to talk about your worries?
- iv. How often does he/she disappoint you when you are counting on him/her? (reverse coded)

**Depression items:**

Within the last week, have you for the majority of the time: (Response choices: yes, no)

- i. Felt depressed?
- ii. Felt that everything you did was an effort?
- iii. Felt your sleep was restless?
- iv. Felt happy? (reverse coded)
- v. Felt lonely?
- vi. Felt that you enjoyed life? (reverse coded)
- vii. Felt sad?
- viii. Felt tired?
- ix. Felt you had a lot of energy? (reverse coded)

Supplemental Table 3: *Missing Data Summary*

|                                                                        | Husbands |           | Wives |           |
|------------------------------------------------------------------------|----------|-----------|-------|-----------|
|                                                                        | N        | % Missing | N     | % Missing |
| <b>Cognitive Tasks Used to Construct General Cognitive Ability (g)</b> |          |           |       |           |
| Verbal Learning                                                        | 3,649    | 9.2%      | 3,834 | 4.6%      |
| Verbal Recall                                                          | 3,640    | 9.4%      | 3,816 | 5.0%      |
| Visual Scanning                                                        | 3,443    | 14.3%     | 3,620 | 9.9%      |
| Verbal Fluency                                                         | 3,652    | 9.1%      | 3,824 | 4.8%      |
| Orientation                                                            | 3,670    | 8.6%      | 3,843 | 4.3%      |
| Visuospatial                                                           | 3,459    | 13.9%     | 3,611 | 10.1%     |
| Visuospatial Recall                                                    | 3,407    | 15.2%     | 3,580 | 10.9%     |
| <b>Variables Used in Seemingly Unrelated Regressions</b>               |          |           |       |           |
| <i>Dependent Variables</i>                                             |          |           |       |           |
| General Cognitive Ability (g)                                          | 4,017    | 0.0%      | 4,017 | 0.0%      |
| <i>Independent Variables</i>                                           |          |           |       |           |
| Age                                                                    | 4,011    | 0.1%      | 4,012 | 0.1%      |
| Locality Size                                                          | 3,987    | 0.7%      | 3,987 | 0.7%      |
| Employment History                                                     | 4,016    | 0.0%      | 4,014 | 0.1%      |
| Education                                                              | 4,001    | 0.4%      | 4,001 | 0.4%      |
| Income Decile                                                          | 3,949    | 1.7%      | 3,949 | 1.7%      |
| Couple-Level Wealth Decile                                             | 4,017    | 0.0%      | 4,017 | 0.0%      |
| Chronic Condition Count                                                | 3,999    | 0.4%      | 4,005 | 0.3%      |
| ADL                                                                    | 3,792    | 5.6%      | 3,920 | 2.4%      |
| IADL                                                                   | 3,740    | 6.9%      | 3,893 | 3.1%      |
| Binge Drinking                                                         | 3,998    | 0.5%      | 4,017 | 0.0%      |
| Smoking                                                                | 4,013    | 0.1%      | 4,017 | 0.0%      |

|                            |       |      |       |      |
|----------------------------|-------|------|-------|------|
| Exercise                   | 3,741 | 6.9% | 3,891 | 3.1% |
| Depressive Symptoms        | 3,706 | 7.7% | 3,872 | 3.6% |
| Social Support from Spouse | 3,698 | 7.9% | 3,856 | 4.0% |

*Note.* Source: authors' own calculation using data from the 2012 Mexican Health and Aging Study (MHAS) including 4,017 husband-wife dyads.

Supplemental Table 4: Associations between Spousal Education, Own Education, and Proposed Mechanisms among Older Mexican Adults

|                                       |                       | Smoking Behavior (Multinomial Logit,<br>Reference: Never Smoker) |        |                                |        |                                  |        |                                                   |        |                             |        |                           |        |               |        |                |        |                  |        |                          |        |                              |        |
|---------------------------------------|-----------------------|------------------------------------------------------------------|--------|--------------------------------|--------|----------------------------------|--------|---------------------------------------------------|--------|-----------------------------|--------|---------------------------|--------|---------------|--------|----------------|--------|------------------|--------|--------------------------|--------|------------------------------|--------|
|                                       |                       | Household Wealth<br>Decile (OLS)                                 |        | Spousal Income<br>Decile (OLS) |        | Chronic Condition<br>Count (OLS) |        | Activity of Daily<br>Living Limitation<br>(Logit) |        | Instrumental ADL<br>(Logit) |        | Binge Drinking<br>(Logit) |        | Former Smoker |        | Current Smoker |        | Exercise (Logit) |        | Spousal Support<br>(OLS) |        | Depressive<br>Symptoms (OLS) |        |
|                                       |                       | Model 1                                                          |        | Model 2                        |        | Model 3                          |        | Model 4                                           |        | Model 5                     |        | Model 6                   |        | Model 7       |        | Model 8        |        | Model 9          |        | Model 10                 |        | Model 11                     |        |
|                                       |                       | $\beta$                                                          | SE     | $\beta$                        | SE     | $\beta$                          | SE     | $\beta$                                           | SE     | $\beta$                     | SE     | $\beta$                   | SE     | $\beta$       | SE     | $\beta$        | SE     | $\beta$          | SE     | $\beta$                  | SE     | $\beta$                      | SE     |
| <b>PANEL I: Husbands</b>              |                       |                                                                  |        |                                |        |                                  |        |                                                   |        |                             |        |                           |        |               |        |                |        |                  |        |                          |        |                              |        |
| Partner Education (Ref: No Education) |                       |                                                                  |        |                                |        |                                  |        |                                                   |        |                             |        |                           |        |               |        |                |        |                  |        |                          |        |                              |        |
|                                       | Incomplete Elementary | 0.37**                                                           | (0.13) | 0.07                           | (0.13) | 0.09                             | (0.05) | -0.03                                             | (0.13) | -0.21                       | (0.17) | 0.24                      | (0.16) | 0.31**        | (0.11) | 0.38*          | (0.15) | -0.20            | (0.10) | -0.02                    | (0.08) | -0.12                        | (0.12) |
|                                       | Complete Elementary   | 0.42**                                                           | (0.15) | 0.03                           | (0.15) | -0.01                            | (0.05) | -0.17                                             | (0.16) | -0.47*                      | (0.20) | 0.53**                    | (0.17) | 0.20          | (0.12) | 0.54***        | (0.16) | -0.04            | (0.12) | -0.03                    | (0.09) | -0.22                        | (0.13) |
|                                       | Beyond Elementary     | 1.20***                                                          | (0.16) | 1.20***                        | (0.16) | 0.01                             | (0.06) | -0.21                                             | (0.18) | -0.68**                     | (0.25) | 0.44*                     | (0.18) | 0.22          | (0.14) | 0.56**         | (0.18) | -0.19            | (0.13) | 0.09                     | (0.09) | -0.52***                     | (0.14) |
| Own Education (Ref: No Education)     |                       |                                                                  |        |                                |        |                                  |        |                                                   |        |                             |        |                           |        |               |        |                |        |                  |        |                          |        |                              |        |
|                                       | Incomplete Elementary | 0.46***                                                          | (0.14) | 0.04                           | (0.14) | -0.06                            | (0.05) | -0.30*                                            | (0.13) | -0.17                       | (0.17) | 0.11                      | (0.16) | -0.31**       | (0.12) | -0.26          | (0.15) | 0.10             | (0.11) | 0.10                     | (0.08) | -0.38**                      | (0.12) |
|                                       | Complete Elementary   | 0.68***                                                          | (0.15) | -0.56***                       | (0.15) | 0.00                             | (0.05) | -0.58***                                          | (0.16) | -0.31                       | (0.20) | 0.03                      | (0.17) | -0.23         | (0.13) | -0.20          | (0.17) | 0.15             | (0.12) | 0.26**                   | (0.09) | -0.57***                     | (0.14) |
|                                       | Beyond Elementary     | 1.24***                                                          | (0.16) | -0.09                          | (0.16) | -0.08                            | (0.06) | -0.98***                                          | (0.18) | -0.93***                    | (0.25) | 0.19                      | (0.18) | -0.41**       | (0.14) | -0.48**        | (0.18) | 0.11             | (0.13) | 0.28**                   | (0.09) | -1.03***                     | (0.14) |
|                                       | n                     | 3,986                                                            |        | 3,918                          |        | 3,968                            |        | 3,763                                             |        | 3,711                       |        | 3,967                     |        | 3,982         |        | 3,982          |        | 3,712            |        | 3,670                    |        | 3,678                        |        |
| <b>PANEL II: Wives</b>                |                       |                                                                  |        |                                |        |                                  |        |                                                   |        |                             |        |                           |        |               |        |                |        |                  |        |                          |        |                              |        |
| Partner Education (Ref: No Education) |                       |                                                                  |        |                                |        |                                  |        |                                                   |        |                             |        |                           |        |               |        |                |        |                  |        |                          |        |                              |        |
|                                       | Incomplete Elementary | 0.46***                                                          | (0.14) | 0.17                           | (0.14) | -0.04                            | (0.05) | -0.12                                             | (0.13) | 0.29                        | (0.16) | 0.59                      | (0.48) | 0.49*         | (0.20) | 0.11           | (0.29) | -0.09            | (0.12) | 0.17                     | (0.11) | -0.30*                       | (0.14) |
|                                       | Complete Elementary   | 0.68***                                                          | (0.15) | 0.30                           | (0.16) | -0.05                            | (0.05) | -0.34*                                            | (0.15) | -0.04                       | (0.19) | 0.18                      | (0.53) | 0.32          | (0.23) | 0.34           | (0.30) | 0.07             | (0.13) | 0.38**                   | (0.12) | -0.39**                      | (0.15) |
|                                       | Beyond Elementary     | 1.24***                                                          | (0.16) | 1.30***                        | (0.17) | -0.22***                         | (0.06) | -0.54***                                          | (0.16) | -0.12                       | (0.21) | 0.81                      | (0.51) | 0.66**        | (0.23) | 0.88**         | (0.30) | 0.08             | (0.13) | 0.66***                  | (0.13) | -0.83***                     | (0.16) |
| Own Education (Ref: No Education)     |                       |                                                                  |        |                                |        |                                  |        |                                                   |        |                             |        |                           |        |               |        |                |        |                  |        |                          |        |                              |        |
|                                       | Incomplete Elementary | 0.37**                                                           | (0.13) | 0.47***                        | (0.14) | -0.02                            | (0.05) | -0.05                                             | (0.12) | -0.40**                     | (0.14) | -0.33                     | (0.44) | -0.21         | (0.19) | -0.09          | (0.28) | 0.04             | (0.11) | 0.05                     | (0.11) | -0.13                        | (0.13) |
|                                       | Complete Elementary   | 0.42**                                                           | (0.15) | 0.58***                        | (0.16) | -0.10                            | (0.05) | -0.28                                             | (0.14) | -0.66***                    | (0.17) | 0.41                      | (0.44) | -0.03         | (0.20) | 0.63*          | (0.28) | 0.19             | (0.12) | -0.13                    | (0.12) | -0.25                        | (0.15) |
|                                       | Beyond Elementary     | 1.20***                                                          | (0.16) | 0.95***                        | (0.17) | -0.24***                         | (0.06) | -0.55***                                          | (0.17) | -1.32***                    | (0.22) | 0.62                      | (0.45) | 0.72***       | (0.20) | 0.73*          | (0.29) | 0.46***          | (0.13) | 0.05                     | (0.13) | -0.94***                     | (0.16) |
|                                       | n                     | 3,986                                                            |        | 3,918                          |        | 3,974                            |        | 3,889                                             |        | 3,863                       |        | 3,986                     |        | 3,986         |        | 3,861          |        | 3,861            |        | 3,826                    |        | 3,842                        |        |

Note. Source: authors' own calculation using data from the 2012 Mexican Health and Aging Study (MHAS).  $\beta$  = unstandardized parameter estimate. SE = standard error. \* indicates p<0.05, \*\* indicates p<0.01, \*\*\* indicates p<0.001.

Supplemental Table 5: *Main and Interaction Effects of Own and Spousal Education among Older Mexican Adults (n=4,017 Husband-Wife Dyads)*

|                                                        | Husband's Cognition |      | Wife's Cognition |      |
|--------------------------------------------------------|---------------------|------|------------------|------|
|                                                        | $\beta$             | SE   | $\beta$          | SE   |
| <i>Own Education (Ref: No Education)</i>               |                     |      |                  |      |
| Incomplete Elementary                                  | 0.18**              | 0.06 | 0.35***          | 0.06 |
| Complete Elementary                                    | 0.25**              | 0.08 | 0.65***          | 0.09 |
| Beyond Elementary                                      | 0.46***             | 0.12 | 0.87***          | 0.16 |
| <i>Spousal Education (Ref: No Education)</i>           |                     |      |                  |      |
| Incomplete Elementary                                  | 0.11                | 0.06 | 0.10             | 0.06 |
| Complete Elementary                                    | 0.26**              | 0.08 | 0.01             | 0.09 |
| Beyond Elementary                                      | 0.15                | 0.17 | 0.18             | 0.16 |
| <i>Interaction (Spousal Education * Own Education)</i> |                     |      |                  |      |
| Incomplete Elementary * Incomplete Elementary          | 0.05                | 0.08 | 0.05             | 0.08 |
| Incomplete Elementary * Complete Elementary            | 0.27**              | 0.10 | -0.07            | 0.11 |
| Incomplete Elementary * Beyond Elementary              | 0.34*               | 0.14 | 0.03             | 0.18 |
| Complete Elementary * Incomplete Elementary            | 0.05                | 0.10 | 0.27*            | 0.11 |
| Complete Elementary * Complete Elementary              | 0.19                | 0.11 | 0.19             | 0.12 |
| Complete Elementary * Beyond Elementary                | 0.26                | 0.14 | 0.26             | 0.19 |
| Beyond Elementary * Incomplete Elementary              | 0.24                | 0.18 | 0.22             | 0.18 |
| Beyond Elementary * Complete Elementary                | 0.44*               | 0.18 | 0.08             | 0.18 |
| Beyond Elementary * Beyond Elementary                  | 0.59**              | 0.20 | 0.24             | 0.23 |
| Constant                                               | 1.24***             | 0.13 | 1.24***          | 0.12 |

*Note.* Source: authors' own calculation using data from the 2012 Mexican Health and Aging Study (MHAS).  $\beta$  = unstandardized parameter estimate. SE = standard error. \* indicates  $p < 0.05$ , \*\* indicates  $p < 0.01$ , \*\*\* indicates  $p < 0.001$ .

Supplemental Table 6: *Cross Tabulation of Husband's and Wife's Education among Older Mexican Adults (n=3,986 Husband-Wife Dyads)*

| <b>Wife's Education</b>      | <b>Husband Education</b> |                              |                            |                          |
|------------------------------|--------------------------|------------------------------|----------------------------|--------------------------|
|                              | <i>No Education</i>      | <i>Incomplete Elementary</i> | <i>Complete Elementary</i> | <i>Beyond Elementary</i> |
| <i>No Education</i>          | 312                      | 239                          | 76                         | 28                       |
| <i>Incomplete Elementary</i> | 221                      | 610                          | 260                        | 136                      |
| <i>Complete Elementary</i>   | 62                       | 241                          | 383                        | 261                      |
| <i>Beyond Elementary</i>     | 17                       | 99                           | 177                        | 864                      |

*Note.* Source: authors' own calculation using data from the 2012 Mexican Health and Aging Study (MHAS).
